# Supplementary material
Source: PubMed Central journal article supplement (PMC3748990)
Supplement: jbjs_95_14_1278_ds01.pdf [file jbjs_95_14_1278_ds01.pdf]

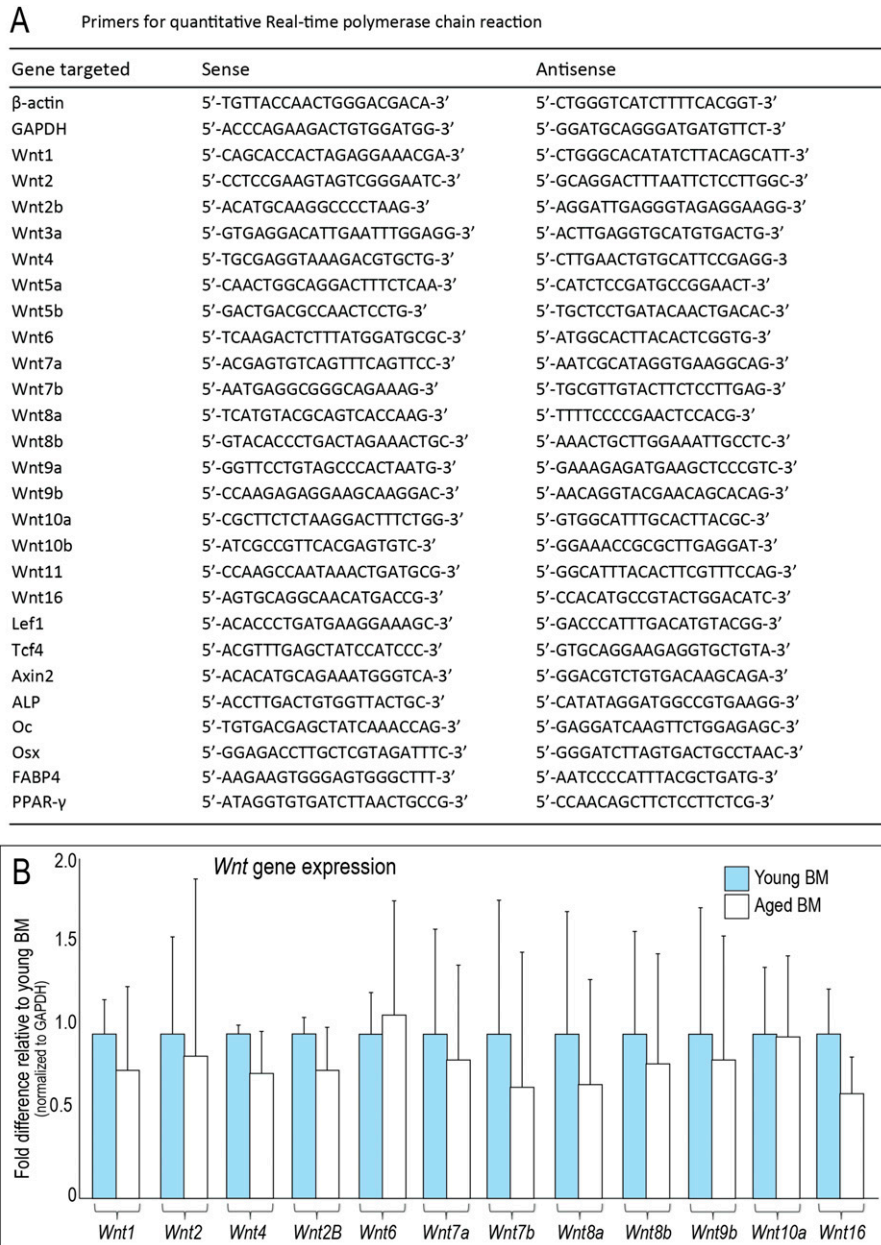

Fig. E-1

**Fig. E-1A** Primers used for quantitative real-time polymerase chain reaction. **Fig. E-1B** Quantitative real-time polymerase chain reaction to evaluate relative expression levels of *Wnt* ligands in bone marrow harvested from young (blue bars; n = 3) and aged (white bars; n = 3) bone marrow (BM) donors. Gene expression levels normalized to glyceraldehyde 3-phosphate dehydrogenase (GAPDH).

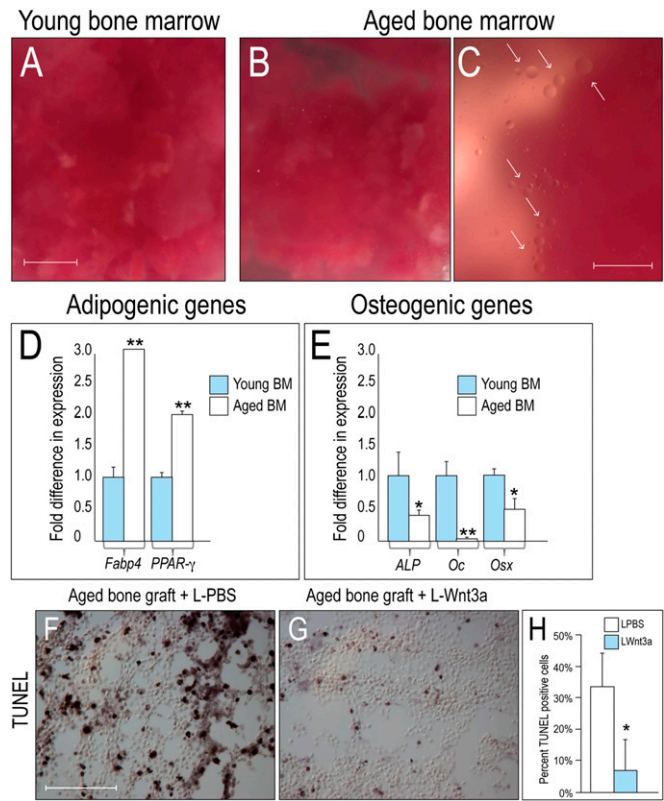

Fig. E-2  
 Aged bone marrow undergoes fatty degeneration. Compared with the gross appearance of bone marrow harvested from young donors (**Fig. E-2A**), bone marrow from aged donors is fatty (**Fig. E-2B**); arrows indicate fat droplets (**Fig. E-2C**). **Fig. E-2D** Quantitative reverse transcription-polymerase chain reaction (qRT-PCR) analyses for the adipogenic genes fatty acid-binding protein 4 (*Fabp4*) and peroxisome proliferator-activated receptor gamma (*PPAR-γ*) in bone marrow (BM) from young animals (blue bars; n = 3) compared with bone marrow from aged animals (white bars; n = 3). **Fig. E-2E** qRT-PCR analyses for the osteogenic genes alkaline phosphatase (ALP), osteocalcin (*Oc*), and osterix (*Osx*) in bone marrow (BM) from young animals (blue bars; n = 3) compared with bone marrow from aged animals (white bars; n = 3). Gene expression levels normalized to beta-actin. **Figs. E-2F and E-2G** Terminal deoxynucleotidyl transferase dUTP nick end labeling (TUNEL) staining in aged bone marrow following a twelve-hour incubation in liposomal phosphate-buffered saline solution (L-PBS) (**Fig. E-2F**) (n = 3) or L-Wnt3a (**Fig. E-2G**) (n = 3; effective concentration = 150 ng/mL), quantified in **Fig. E-2H**. Single asterisk denotes p < 0.05; double asterisk denotes p < 0.01. Scale bars: 1 mm (Fig. E-2A [scale bar in Fig. E-2A also applies to Fig. E-2B]); 400 μm (Fig. E-2C); and 50 μm (Fig. E-2F [scale bar in Fig. E-2F also applies to Fig. E-2G]).

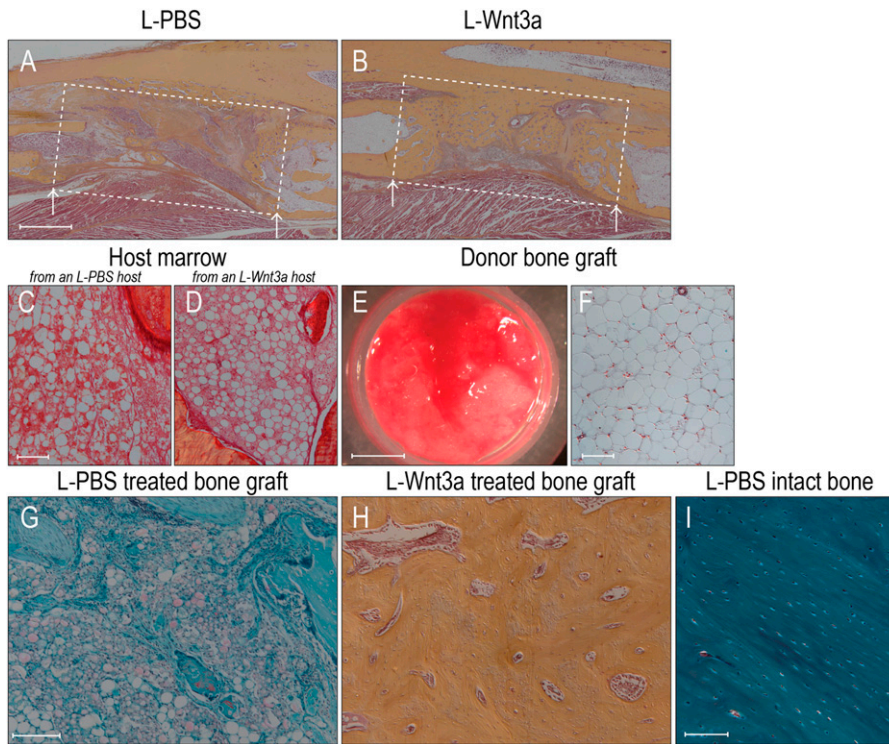

Fig. E-3  
 Movat pentachrome staining of injury site (boxed area) treated with aged bone marrow incubated in liposomal phosphate-buffered saline solution (L-PBS) (**Fig. E-3A**) or L-Wnt3a (**Fig. E-3B**). **Fig. E-3C and E-3D** Under polarized light, picosirius red staining confirms that aged host rabbits treated with L-PBS (**Fig. E-3C**) or liposomal Wnt3a protein (L-Wnt3a) (**Fig. E-3D**) both showed evidence of fatty degeneration in their bone marrow. **Fig. E-3E** Morphology of fatty bone marrow harvested from an aged donor rabbit, prior to transplantation. **Fig. E-3F** Gömöri trichrome staining confirms that the graft consists of fatty bone marrow. **Fig. E-3G** Safranin O/fast green staining identifies cartilage, fibrocartilage, immature osteoid, and adipose in bone grafts treated with L-PBS. **Fig. E-3H** Pentachrome staining identifies new osteoid matrix with large blood vessel spaces formed in bone grafts treated with L-Wnt3a. Compare this new bone matrix with Gömöri trichrome (**Fig. E-3I**) staining of the host's intact bone cortex, which has a lamellar organization, typical of mature bone. Arrows mark the edge of intact bone. Scale bars: 500  $\mu\text{m}$  (Fig. E-3A [scale bar in Fig. E-3A also applies to Fig. E-3B]); 200  $\mu\text{m}$  (Fig. E-3C [scale bar in Fig. E-3C also applies to Fig. E-3D]); 250  $\mu\text{m}$  (Fig. E-3E); 100  $\mu\text{m}$  (Fig. E-3F); 200  $\mu\text{m}$  (Fig. E-3G [scale bar in Fig. E-3G also applies to Fig. E-3H]); and 100  $\mu\text{m}$  (Fig. E-3I).
